# Supplementary material for: Effect of Dietary Patterns on Inflammatory Bowel Disease: A Machine Learning Bibliometric and Visualization Analysis
Source: MDPI journal article supplement (doi:10.3390/nu15153442), 2023-08-03
Supplement: s1 [file s1]

Supplementary Table S7. Top 15 Keywords based on CiteSpace 's degree, Centrality, Sigma

| Rank | Centrality | Keywords                   | Degree | Keywords                   | Sigma | Keywords                 |
|------|------------|----------------------------|--------|----------------------------|-------|--------------------------|
| 1    | 0.35       | inflammatory bowel disease | 244    | inflammatory bowel disease | 1.68  | ulcerative coliti        |
| 2    | 0.2        | crohns disease             | 198    | crohns disease             | 1.43  | nf kappa b               |
| 3    | 0.2        | ulcerative coliti          | 181    | ulcerative coliti          | 1.36  | colorectal cancer        |
| 4    | 0.1        | chain fatty acid           | 113    | chain fatty acid           | 1.33  | dietary fiber            |
| 5    | 0.07       | expression                 | 99     | expression                 | 1.31  | gut microbiota           |
| 6    | 0.07       | dietary fiber              | 92     | dietary fiber              | 1.23  | celiac disease           |
| 7    | 0.07       | nf kappa b                 | 85     | children                   | 1.19  | expression               |
| 8    | 0.07       | celiac disease             | 81     | coliti                     | 1.19  | irritable bowel syndrome |
| 9    | 0.06       | children                   | 79     | bowel disease              | 1.19  | fish oil                 |
| 10   | 0.06       | disease                    | 77     | association                | 1.18  | intestinal microbiota    |
| 11   | 0.06       | colorectal cancer          | 76     | nf kappa b                 | 1.16  | risk                     |
| 12   | 0.06       | irritable bowel syndrome   | 75     | disease                    | 1.14  | disease                  |
| 13   | 0.04       | coliti                     | 73     | risk factor                | 1.14  | fecal microbiota         |
| 14   | 0.04       | bowel disease              | 72     | colorectal cancer          | 1.13  | prevalence               |
| 15   | 0.04       | association                | 72     | intestinal epithelial cell | 1.12  | pattern                  |
