# Supplementary material for: Effect of Dietary Patterns on Inflammatory Bowel Disease: A Machine Learning Bibliometric and Visualization Analysis
Source: MDPI journal article supplement (doi:10.3390/nu15153442), 2023-08-03
Supplement: s1 [file s1]

Supplementary Table S6. Top 10 references of centrality and burst

| Rank | Centrality | References                          | Burst | References                           |
|------|------------|-------------------------------------|-------|--------------------------------------|
| 1    | 0.15       | Frank DN, 2007, P NATL ACAD SCI USA | 17.55 | David LA, 2014, NATURE               |
| 2    | 0.09       | Galvez J, 2005, MOL NUTR FOOD RES   | 15.70 | Wu GD, 2011, SCIENCE                 |
| 3    | 0.09       | Wen L, 2008, NATURE                 | 13.58 | Ng SC, 2017, LANCET                  |
| 4    | 0.08       | Wu GD, 2011, SCIENCE                | 12.95 | Molodecky NA, 2012, GASTROENTEROLOGY |
| 5    | 0.08       | Sokol H, 2008, P NATL ACAD SCI USA  | 12.24 | Hou JK, 2011, AM J GASTROENTEROL     |
| 6    | 0.07       | David LA, 2014, NATURE              | 12.02 | Jostins L, 2012, NATURE              |
| 7    | 0.06       | Gevers D, 2014, CELL HOST MICROBE   | 11.89 | Levine A, 2019, GASTROENTEROLOGY     |
| 8    | 0.06       | Agus A, 2016, SCI REP-UK            | 11.70 | Levine A,2020, CLIN GASTROENTEROL H  |
| 9    | 0.06       | Backhed F, 2005, SCIENCE            | 11.55 | Yatsunenko T, 2012, NATURE           |
| 10   | 0.06       | Lepage P, 2011, GASTROENTEROLOGY    | 11.23 | Gevers D, 2014, CELL HOST MICROBE    |
