# Supplementary material for: Effect of Dietary Patterns on Inflammatory Bowel Disease: A Machine Learning Bibliometric and Visualization Analysis
Source: MDPI journal article supplement (doi:10.3390/nu15153442), 2023-08-03
Supplement: s1 [file s1]

Supplementary Table S2. Top 10 total citations or average citations based on OALM

| <b>Rank</b> | <b>Institutions</b>      | <b>Total citations</b> | <b>Institutions</b>                 | <b>Average citations</b> |
|-------------|--------------------------|------------------------|-------------------------------------|--------------------------|
| 1           | Harvard Univ             | 397                    | Univ Paris 11                       | 54.5                     |
| 2           | Univ Montreal            | 277                    | Hosp Univ Penn                      | 53                       |
| 3           | Univ Penn                | 251                    | Umea Univ                           | 52                       |
| 4           | Massachusetts Gen Hosp   | 218                    | Natl Inst Publ Hlth & Environm RIVM | 52                       |
| 5           | Univ Calif San Francisco | 180                    | Univ Med Ctr                        | 52                       |
| 6           | Univ N Carolina          | 168                    | Malmo Univ Hosp                     | 52                       |
| 7           | Karolinska Inst          | 134                    | DKFZ German Canc Res Ctr Heidelberg | 52                       |
| 8           | Univ Calgary             | 118                    | Canc Res & Prevent Inst ISPO        | 52                       |
| 9           | Univ Manitoba            | 116                    | St Justine Univ Hosp                | 52                       |
| 10          | Harvard Med Sch          | 107                    | Nancy Univ Hosp                     | 48                       |
