# Supplementary material for: Effect of Dietary Patterns on Inflammatory Bowel Disease: A Machine Learning Bibliometric and Visualization Analysis
Source: MDPI journal article supplement (doi:10.3390/nu15153442), 2023-08-03
Supplement: s1 [file s1]

Supplementary Table S3. Top 10 journals under multiple influence indicators based on bibliometrix package

| Rank | Journals                                            | h_index | Journals                                            | g_index | Journals                                    | Total citation |
|------|-----------------------------------------------------|---------|-----------------------------------------------------|---------|---------------------------------------------|----------------|
| 1    | NUTRIENTS                                           | 22      | NUTRIENTS                                           | 44      | NATURE                                      | 7552           |
| 2    | WORLD JOURNAL OF GASTROENTEROLOGY                   | 16      | INFLAMMATORY BOWEL DISEASES                         | 26      | GASTROENTEROLOGY                            | 2136           |
| 3    | INFLAMMATORY BOWEL DISEASES                         | 15      | WORLD JOURNAL OF GASTROENTEROLOGY                   | 23      | JOURNAL OF CLINICAL GASTROENTEROLOGY        | 2109           |
| 4    | JOURNAL OF CROHNS & COLITIS                         | 15      | PLOS ONE                                            | 23      | INTERNATIONAL JOURNAL OF MOLECULAR SCIENCES | 2055           |
| 5    | PLOS ONE                                            | 14      | JOURNAL OF CROHNS & COLITIS                         | 22      | NUTRIENTS                                   | 2039           |
| 6    | GASTROENTEROLOGY                                    | 14      | INTERNATIONAL JOURNAL OF MOLECULAR SCIENCES         | 19      | BRITISH JOURNAL OF NUTRITION                | 1321           |
| 7    | INTERNATIONAL JOURNAL OF MOLECULAR SCIENCES         | 13      | DIGESTIVE DISEASES AND SCIENCES                     | 19      | AMERICAN JOURNAL OF GASTROENTEROLOGY        | 1314           |
| 8    | AMERICAN JOURNAL OF GASTROENTEROLOGY                | 11      | GASTROENTEROLOGY                                    | 15      | MICROORGANISMS                              | 1145           |
| 9    | FRONTIERS IN IMMUNOLOGY                             | 10      | FRONTIERS IN IMMUNOLOGY                             | 15      | EUROPEAN JOURNAL OF NUTRITION               | 1111           |
| 10   | JOURNAL OF PEDIATRIC GASTROENTEROLOGY AND NUTRITION | 10      | JOURNAL OF PEDIATRIC GASTROENTEROLOGY AND NUTRITION | 14      | INFLAMMATORY BOWEL DISEASES                 | 1098           |
| 10   | DIGESTIVE DISEASES AND SCIENCES                     | 10      |                                                     |         |                                             |                |
