# Supplementary material for: Effect of Dietary Patterns on Inflammatory Bowel Disease: A Machine Learning Bibliometric and Visualization Analysis
Source: MDPI journal article supplement (doi:10.3390/nu15153442), 2023-08-03
Supplement: s1 [file s1]

Supplementary Table S4. Top 10 journals in the number of cited articles

| Rank | Journals            | The number of articles cited | IF     | JCR Partition |
|------|---------------------|------------------------------|--------|---------------|
| 1    | GASTROENTEROLOGY    | 3351                         | 33.883 | 1             |
| 2    | GUT                 | 3058                         | 31.793 | 1             |
| 3    | INFLAMM BOWEL DIS   | 2291                         | 7.290  | 1             |
| 4    | NATURE              | 1778                         | 69.504 | 1             |
| 5    | AM J GASTROENTEROL  | 1547                         | 12.045 | 1             |
| 6    | PLOS ONE            | 1345                         | 3.752  | 2             |
| 7    | P NATL ACAD SCI USA | 1209                         | 12.779 | 1             |
| 8    | SCIENCE             | 1022                         | 63.714 | 1             |
| 9    | ALIMENT PHARM THER  | 954                          | 9.524  |               |
| 10   | NUTRIENTS           | 925                          | 6.706  | 1             |
