# Supplementary material for: Effect of Dietary Patterns on Inflammatory Bowel Disease: A Machine Learning Bibliometric and Visualization Analysis
Source: MDPI journal article supplement (doi:10.3390/nu15153442), 2023-08-03
Supplement: s1 [file s1]

Supplementary Table S5. Top 15 references

| Rank | Cited References                              | Citations | Year | Journal                  | IF      | JCR Partition |
|------|-----------------------------------------------|-----------|------|--------------------------|---------|---------------|
| 1    | TURNBAUGH PJ, 2006, NATURE                    | 96        | 2011 | SCIENCE                  | 63.714  | Q1            |
| 2    | DEVKOTA S, 2012, NATURE                       | 87        | 2011 | GASTROENTEROL            | 12.045  | Q1            |
| 3    | ANANTHAKRISHNAN AN, 2014, GUT                 | 84        | 2014 | NATURE                   | 69.504  | Q1            |
| 4    | RACINE A, 2016, INFLAMM BOWEL DIS             | 77        | 2012 | GASTROENTEROLOGY         | 33.883  | Q1            |
| 5    | CHASSAING B, 2015, NATURE                     | 74        | 2013 | GASTROENTEROLOGY         | 33.883  | Q1            |
| 6    | COHEN AB, 2013, DIGEST DIS SCI                | 72        | 2010 | Proc Natl Acad Sci U S A | 12.779  | Q1            |
| 7    | JANTCHOU P, 2010, AM J GASTROENTEROL          | 69        | 2017 | Lancet                   | 202.731 | Q1            |
| 8    | JOWETT SL, 2004, GUT                          | 61        | 2004 | GUT                      | 31.734  | Q1            |
| 9    | NG SC, 2017, LANCET                           | 57        | 2010 | GASTROENTEROL            | 12.045  | Q1            |
| 10   | DE FILIPPO C, 2010, P NATL ACAD SCI USA       | 54        | 2015 | NATURE                   | 69.504  | Q1            |
| 11   | ANANTHAKRISHNAN AN, 2013,<br>GASTROENTEROLOGY | 54        | 2013 | Dig Dis Sci              | 3.487   | Q3            |
| 12   | MOLODECKY NA, 2012, GASTROENTEROLOGY          | 53        | 2014 | GUT                      | 31.734  | Q1            |
| 13   | DAVID LA, 2014, NATURE                        | 53        | 2016 | Inflamm Bowel Dis        | 7.290   | Q1            |
| 14   | HOU JK, 2011, AM J GASTROENTEROL              | 52        | 2012 | NATURE                   | 69.504  | Q1            |

15 WU GD, 2011, SCIENCE

51 2006 NATURE

69.504 Q1

---
