# Supplementary material for: Effect of Dietary Patterns on Inflammatory Bowel Disease: A Machine Learning Bibliometric and Visualization Analysis
Source: MDPI journal article supplement (doi:10.3390/nu15153442), 2023-08-03
Supplement: s1 [file s1]

Supplementary Table S1. Top 10 authors of related literature based on bibliometrix package

| Rank | Authors            | Number of publications |
|------|--------------------|------------------------|
| 1    | GHOSH S            | 10                     |
| 2    | ANANTHAKRISHNAN AN | 8                      |
| 3    | CHAN AT            | 8                      |
| 4    | GASBARRINI A       | 8                      |
| 5    | HALLER D           | 8                      |
| 6    | COLOMBEL JF        | 7                      |
| 7    | DIJKSTRA G         | 7                      |
| 8    | GIBSON PR          | 7                      |
| 9    | NG SC              | 7                      |
| 10   | RAMAN M            | 7                      |
| 11   | SZILAGYI A         | 7                      |
